# Supplementary material for: Impact of High-Deductible Health Plans on Medication Use Among Individuals With Bipolar Disorder
Source: Atypon-hosted journal article supplement (doi:10.1176/appi.ps.202000362), 2021-05-11
Supplement: appi.ps.202000362.ds001.pdf [file appi.ps.202000362.ds001.pdf]

## **Contents**

### **I. Methods**

#### **Annual Deductible Imputation**

To estimate employer annual deductibles, we used a benefits variable available for most smaller employers (approximately  $\leq 100$  employees) and for larger employers, we imputed deductible levels using out-of-pocket costs among employees who utilized health services, an algorithm that had 96.2% sensitivity and 97.0% specificity.

#### **Bipolar Cohort and Bipolar Type Identification Algorithm**

We included individuals with diagnosis codes for bipolar I (International Classification of Diseases, 9<sup>th</sup> revision [ICD-9-CM] codes: 296.0x-296.1x, 296.4x-296.7), bipolar II (296.89), or other unspecified bipolar disorder (296.80-296.82, 301.11, 301.13), and assigned them to one of those three categories based on their earliest qualifying diagnoses of either 1 inpatient claim (with a first position diagnosis), or 2 outpatient claims (with a first or second position diagnosis) on separate days within 24 months of each other. If individuals had more than one qualifying bipolar category, bipolar I was given priority, then bipolar II. Individuals also qualified if their only diagnoses were from outpatient claims within the 2-year timeframe and on different days, but from different bipolar categories. These members were categorized as other unspecified bipolar disorder. Then we excluded members with schizophrenia or schizoaffective disorder diagnoses (ICD-9-CM: 295.0-295.95).

#### **Medications for Treatment of Bipolar Disorder**

We included the following: lithium, four guideline-recommended anticonvulsants (carbamazepine, divalproex sodium, lamotrigine, and valproic acid), and select first generation antipsychotic medications (chlorpromazine, droperidol, fluphenazine, haloperidol, loxapine, perphenazine, pimozide, prochlorperazine, thioridazine, thiothixene, trifluoperazine), and second-generation antipsychotics (aripiprazole, asenapine, clozapine, iloperidone, lurasidone, olanzapine, paliperidone, quetiapine, risperidone, ziprasidone).

#### **Covariates**

Using 2008-2012 American Community Survey 5-year estimates at the census tract level (1–3), we classified members according to the income and education levels of their neighborhood. We categorized neighborhoods having proportions of households below the Federal Poverty Level of  $< 9.9\%$  as higher income and  $\geq 10\%$  as lower income. We consolidated neighborhoods having proportions of adults without a high school diploma of  $< 25.0\%$  as higher education and  $\geq 25.0\%$  as lower education. We used geocoding to classify participants as living in predominantly ( $> 75\%$ ) white, black, Hispanic, or mixed neighborhoods, and we further overwrote the classification of select participants as Hispanic or Asian using the E-Tech system (Ethnic Technologies), which analyzes surnames and geographic locations of individuals (4,5). This validated approach of combining surname analysis and Census data has positive and negative predictive values of approximately 80%

and 90%, respectively (5). To estimate morbidity, we applied the ACG® algorithm based on age, sex, and diagnoses during the baseline year (6,7). Age categories were 12-18, 19-29, 30-39, 40-49, and 50-64 years. US regions of residence were West, Midwest, South, and Northeast. We created employer size categories of 0-99, 100-999, and 1000+ enrollees.

## **Matching Strategy**

Coarsened exact matching tries to mimic the process of stratification by population characteristics and then randomization within the defined strata (i.e., fully blocked randomization). Coarsened exact matching is similar to exact matching but it classifies matching variables into discrete categories (e.g., 5-year age groups instead of continuous age in years). The final sample includes all members in both study groups that have common classification criteria. Coarsened exact matching software creates weights for all members in the matched strata to equalize the percentage of members in a given strata between the study groups.

We matched on employer- and member-level baseline covariates. These included quartile for employer baseline out-of-pocket costs to standardized costs ratio, four categories of baseline total out-of-pocket costs, and quartile for member's baseline total standardized cost. Matching variables also included employer and member-level propensity to join HDHPs. The employer-level propensity score included employer size; proportion of women; proportions of members in each of 4 US regions and in race/ethnicity, age, education, and income categories; baseline total standardized cost; mean employer Adjusted Clinical Groups (ACG) score; median copay; index month/year; and type of insurance plan (HMO, PPO, POS). The member-level propensity score included age category, US region, employer size, year of first qualifying diagnosis, baseline count of prescription medication categories, and baseline quarterly pharmacy out-of-pocket spending.

## **Standardized Medication Dose Measure Construction**

Using data on units dispensed and days' supply in pharmacy claims for the entire population represented in our national database, we first identified the median number of units dispensed per day (e.g., one tablet) for a specific product (e.g., lithium 600mg tablets). Each dispensing can then be converted to the number of SMDs dispensed. In our example, if the median number of units dispensed for all individuals who took lithium 600mg was one tablet, a dispensing of two tablets per day would represent an SMD of 2.0, which would be assigned to each day following the dispensing for the days' supply indicated. We summed the SMD dispensed across medications within categories of interest each month, creating a repeated measure to examine medication use over time. Months were characterized as 30-day time periods relative to the index date.

## **Appropriate Laboratory Monitoring Measure Definition**

The following definitions were used to measure rates of appropriate laboratory monitoring for specific medications: 1) annual proportion of individuals taking lithium (1970 members: 1639 controls and 331 HDHP members) who received testing for lithium level, thyroid stimulating hormone, calcium, and/or a combination of electrolytes, urea, and creatinine levels (EUC); 2) annual proportion of individuals taking carbamazepine (331 members: 272 controls and 59 HDHP members) who received testing for carbamazepine level, complete blood count, liver function, and/or EUC; 3) annual proportion of individuals on valproic acid (1088 members: 922 controls and 166 HDHP members) who received testing for valproate levels, and separately for complete blood count, and/or liver function; and, 4)

annual proportion of individuals on 2<sup>nd</sup> generation antipsychotics (4084 members: 3406 controls and 678 HDHP members) who received testing for lipid and/or serum glucose levels.

**Appendix Table 1.** HICL and Generic Names for Medications Included in Analyses

| <b>Medication Class</b>   | <b>HICL Sequence Numbers</b>                                                                                            | <b>Generic Names</b>                                                                                                                                                                                                                                                                                                                                                                   |
|---------------------------|-------------------------------------------------------------------------------------------------------------------------|----------------------------------------------------------------------------------------------------------------------------------------------------------------------------------------------------------------------------------------------------------------------------------------------------------------------------------------------------------------------------------------|
| Guideline Anti-Convulsant | 11735, 1893, 1884, 7378, 1883, 1882                                                                                     | Oxcarbazepine, Carbamazepine, Divalproex Sodium, Lamotrigine, Valproic Acid, Valproate Sodium                                                                                                                                                                                                                                                                                          |
| Typical Antipsychotics    | 1621, 1624, 1625, 1626, 1662, 1660, 1661, 1663, 1664, 1635, 1666, 1627, 13819, 1637, 1622, 1631, 1668, 1667, 1630, 1623 | Chlorpromazine HCl, Fluphenazine Decanoate, Fluphenazine Enanthate, Fluphenazine HCl, Haloperidol, Haloperidol Decanoate, Haloperidol Lactate, Loxapine HCl, Loxapine Succinate, Mesoridazine Besylate, Molindone HCl, Perphenazine, Perphenazine/Amitriptyline HCl, Pimozide, Promazine HCl, Thioridazine HCl, Thiothixene, Thiothixene HCl, Trifluoperazine HCl, Triflupromazine HCl |
| Atypical Antipsychotics   | 24551, 42595, 36576, 42283, 4834, 36778, 37321, 11814, 36716, 25800, 34343, 36479, 14015, 8721, 25509, 21974, 23379     | Aripiprazole, Aripiprazole Lauroxil, Asenapine Maleate, Brexpiprazole, Clozapine, Iloperidone, Lurasidone HCl, Olanzapine, Olanzapine Pamoate, Olanzapine/Fluoxetine HCl, Paliperidone, Paliperidone Palmitate, Quetiapine Fumarate, Risperidone, Risperidone Microspheres, Ziprasidone HCl, Ziprasidone Mesylate                                                                      |
| Lithium                   | 35133, 1669, 1670, 37605                                                                                                | Lithium Aspartate, Lithium Carbonate, Lithium Citrate, Lithium Citrate Tetrahydrate                                                                                                                                                                                                                                                                                                    |

## II. Results

**Appendix Table 2:** Adjusted difference-in-differences estimates in annual utilization of non-bipolar psychotropic medications and all other medications among members with bipolar disorder before and after a mandated switch to HDHPs, compared with contemporaneous members with bipolar disorder in low-deductible plans (monthly number of standardized medication dose/member).

|                                                     | HDHP     |           | Control  |           | Absolute Change, HDHP vs. Control (95% CI) |                    | Relative Change, HDHP vs. Control (95% CI) |                         |
|-----------------------------------------------------|----------|-----------|----------|-----------|--------------------------------------------|--------------------|--------------------------------------------|-------------------------|
|                                                     | Baseline | Follow-Up | Baseline | Follow-Up |                                            |                    |                                            |                         |
| <b>Non-bipolar psychotropics medication classes</b> |          |           |          |           |                                            |                    |                                            |                         |
| ADHD Medications                                    | 3.8      | 3.9       | 4.3      | 4.6       | -0.1                                       | (-0.1, 0.0)        | -2.5%                                      | (-9.5%, 4.5%)           |
| Antidepressants                                     | 18.0     | 17.6      | 18.4     | 17.9      | 0.2                                        | (-0.4, 0.8)        | 1.2%                                       | (-2.4%, 4.8%)           |
| Benzodiazepines                                     | 7.0      | 7.4       | 6.8      | 7.3       | 0.0                                        | (-0.4, 0.5)        | 0.0%                                       | (-5.9%, 6.1%)           |
| Anxiolytic, Sedatives and Hypnotics                 | 2.3      | 2.5       | 2.3      | 2.5       | 0.1                                        | (-0.2, 0.3)        | 2.8%                                       | (7.2%, 12.8%)           |
| Substance Abuse Disorder Medications                | 0.4      | 0.4       | 0.3      | 0.4       | 0.0                                        | (-0.2, 0.1)        | -10.4%                                     | (-37.5%, 16.7%)         |
| <b>All other medications medication classes</b>     |          |           |          |           |                                            |                    |                                            |                         |
| Antiarrhythmics                                     | 0.5      | 0.4       | 0.4      | 0.4       | 0.0                                        | (-0.1, 0.1)        | -6.4%                                      | (-27.0%, 14.2%)         |
| Anti-asthmatics                                     | 1.9      | 1.9       | 1.9      | 2.0       | -0.1                                       | (-0.3, 0.1)        | -5.1%                                      | (-13.3%, 3.0%)          |
| Antibiotics                                         | 1.2      | 1.2       | 1.2      | 1.2       | 0.1                                        | (-0.1, 0.1)        | 0.1%                                       | (-7.1%, 8.6%)           |
| Antiulcer Medications                               | 2.2      | 2.2       | 2.2      | 2.3       | -0.1                                       | (-0.4, 0.1)        | -6.2%                                      | (-16.3%, 4.0%)          |
| Cold and Allergy Medications                        | 1.2      | 1.3       | 1.3      | 1.4       | 0.0                                        | (-0.7, 0.7)        | -2.1%                                      | (-53.5%, 49.1%)         |
| Gabapentin                                          | 1.1      | 1.2       | 1.1      | 1.1       | 0.0                                        | (-0.1, 0.2)        | 3.4%                                       | (-10.7%, 17.4%)         |
| Antihypertensives                                   | 6.6      | 6.9       | 5.9      | 6.4       | -0.3                                       | (-0.9, 0.2)        | -4.2%                                      | (-11.6%, 3.2%)          |
| Insulin                                             | 0.3      | 0.4       | 0.4      | 0.5       | 0.0                                        | (-0.6, 0.8)        | 2.3%                                       | (-16.8%, 21.4%)         |
| Lipid Lowering Medications                          | 2.8      | 3.2       | 2.8      | 3.2       | -0.1                                       | (-0.5, 0.2)        | 4.4%                                       | (-13.2%, 4.3%)          |
| Opiates                                             | 2.7      | 3.3       | 2.8      | 3.4       | 0.0                                        | (-0.3, 0.3)        | 0.5%                                       | (-8.6%, 9.7%)           |
| Oral Anti-diabetes Medications                      | 1.0      | 1.2       | 1.4      | 1.5       | 0.0                                        | (-0.1, 0.2)        | 3.8%                                       | (-12.5%, 20.0%)         |
| Other Analgesics                                    | 2.3      | 4.3       | 2.2      | 2.5       | 1.8                                        | (-1.9, 5.5)        | 69.8%                                      | (-77.3%, 217.1%)        |
| Antihistamines                                      | 0.2      | 0.1       | 0.2      | 0.2       | <b>-0.1</b>                                | <b>(-0.1, 0.0)</b> | <b>-36.0%</b>                              | <b>(-57.8%, -14.3%)</b> |
| All Other Medications                               | 13.5     | 14.6      | 12.5     | 13.5      | 0.0                                        | (-0.6, 0.6)        | 0.0%                                       | (-4.4%, 4.3%)           |

**Abbreviation:** HDHP, high-deductible health plan; ADHD = attention deficit hyperactivity disorder

**Appendix Table 3:** Annual percent of medication users receiving appropriate lab monitoring for Lithium, Antipsychotic, Carbamazepine and Valproic Acid

|                                        | HDHP     |           | Control  |           | Absolute Change, HDHP vs. Control (95% CI) |             | Relative Change, HDHP vs. Control (95% CI) |                 |
|----------------------------------------|----------|-----------|----------|-----------|--------------------------------------------|-------------|--------------------------------------------|-----------------|
|                                        | Baseline | Follow-Up | Baseline | Follow-Up |                                            |             |                                            |                 |
| <b>Among Lithium Users</b>             |          |           |          |           |                                            |             |                                            |                 |
| Calcium                                | 42%      | 37%       | 43%      | 39%       | 0.0                                        | (-0.1, 0.1) | -3.1%                                      | (-21.3%, 15.0%) |
| Electrolyte, Urea and Creatinine Test  | 60%      | 56%       | 62%      | 54%       | 0.0                                        | (0.0, 0.1)  | 7.0%                                       | (-6.2%, 20.1%)  |
| Lithium                                | 62%      | 58%       | 69%      | 57%       | 0.1                                        | (0.0, 0.1)  | 10.7%                                      | (-2.1%, 23.4%)  |
| Thyroid Stimulating Hormone Test (TSH) | 60%      | 60%       | 64%      | 58%       | 0.0                                        | (0.0, 0.1)  | 9.1%                                       | (-3.8%, 21.9%)  |
| <b>Among Antipsychotics Users</b>      |          |           |          |           |                                            |             |                                            |                 |
| Glucose                                | 49%      | 48%       | 49%      | 44%       | 0.0                                        | (0.0, 0.1)  | 10.0%                                      | (-2.7%, 22.8%)  |
| Lipid                                  | 39%      | 36%       | 36%      | 35%       | 0.0                                        | (-0.1, 0.0) | -3.3%                                      | (-16.7%, 10.1%) |
| <b>Among Carbamazepine Users</b>       |          |           |          |           |                                            |             |                                            |                 |
| Complete Blood Count Test (CBC)        | 60%      | 53%       | 56%      | 58%       | -0.1                                       | (-0.3, 0.1) | -16.0%                                     | (-44.2%, 12.1%) |
| Carbamazepine                          | 43%      | 41%       | 51%      | 44%       | 0.0                                        | (-0.1, 0.2) | 11.9%                                      | (-36.7%, 60.5%) |
| Electrolyte, Urea and Creatinine Test  | 44%      | 55%       | 54%      | 51%       | 0.14                                       | (-0.1, 0.3) | 33.1%                                      | (-21.4, 87.5%)  |
| Liver Function Test (LFT)              | 50%      | 60%       | 59%      | 58%       | 0.1                                        | (-0.1, 0.3) | 22.9%                                      | (-18.9%, 64.6%) |
| <b>Among Valproic Acid Users</b>       |          |           |          |           |                                            |             |                                            |                 |
| Complete Blood Count Test (CBC)        | 52%      | 45%       | 47%      | 46%       | -0.1                                       | (-0.2, 0.1) | -12.1%                                     | (-32.4%, 8.2%)  |
| Liver Function Test (LFT)              | 58%      | 50%       | 50%      | 48%       | -0.1                                       | (-0.2, 0.1) | -10.2%                                     | (-28.8%, 8.4%)  |
| Valproate Levels                       | 4.5%     | 4.6%      | 6.4%     | 6.1%      | 0.0                                        | (0.0, 0.0)  | 7.4%                                       | (-9.6%, 111.1%) |

**Abbreviation:** HDHP, high-deductible health plan

**Appendix Figure 1:** Monthly out-of-pocket expenditures for all medications among members with bipolar disorder before and after a mandated switch to HDHPs, compared with matched controls who were in low-deductible plans in both years

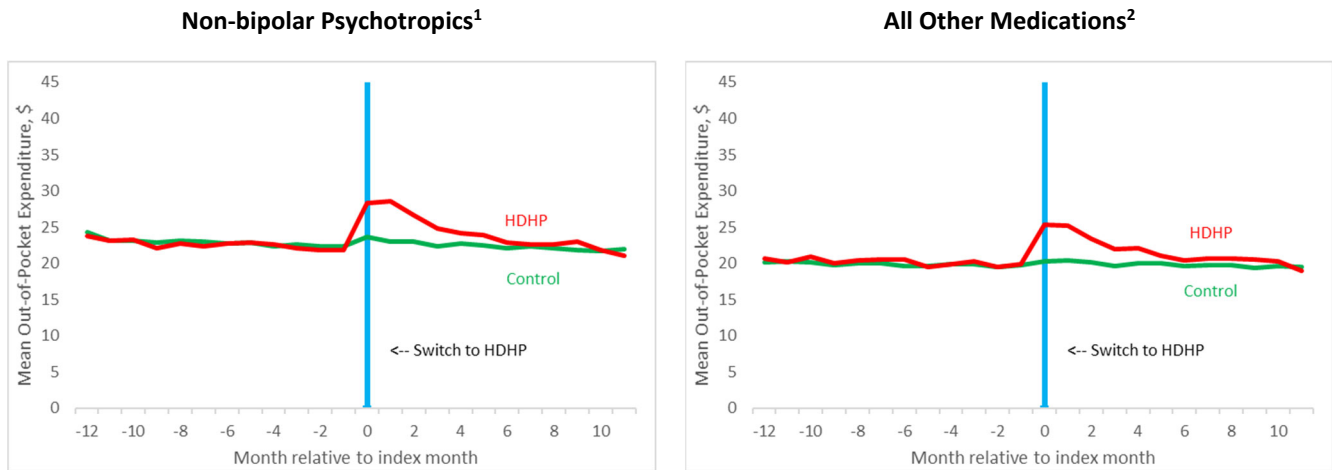

**Abbreviation:** HDHP, high-deductible health plan <sup>1</sup>Non-bipolar psychotropic medications include the following medication classes: attention deficit hyperactivity disorder medications, antidepressants, benzodiazepines, substance abuse disorder medications, anxiolytics, sedatives and hypnotics; <sup>2</sup>All other medications include all prescribed medications from classes not included in the bipolar and non-bipolar psychotropic categories

**Appendix Figure 2:** Monthly average number of standardized medication dose by medication class for bipolar, non-bipolar psychotropics and other medications among members with bipolar disorder before and after a mandated switch to HDHPs, compared with matched controls who were in low-deductible plans in both years

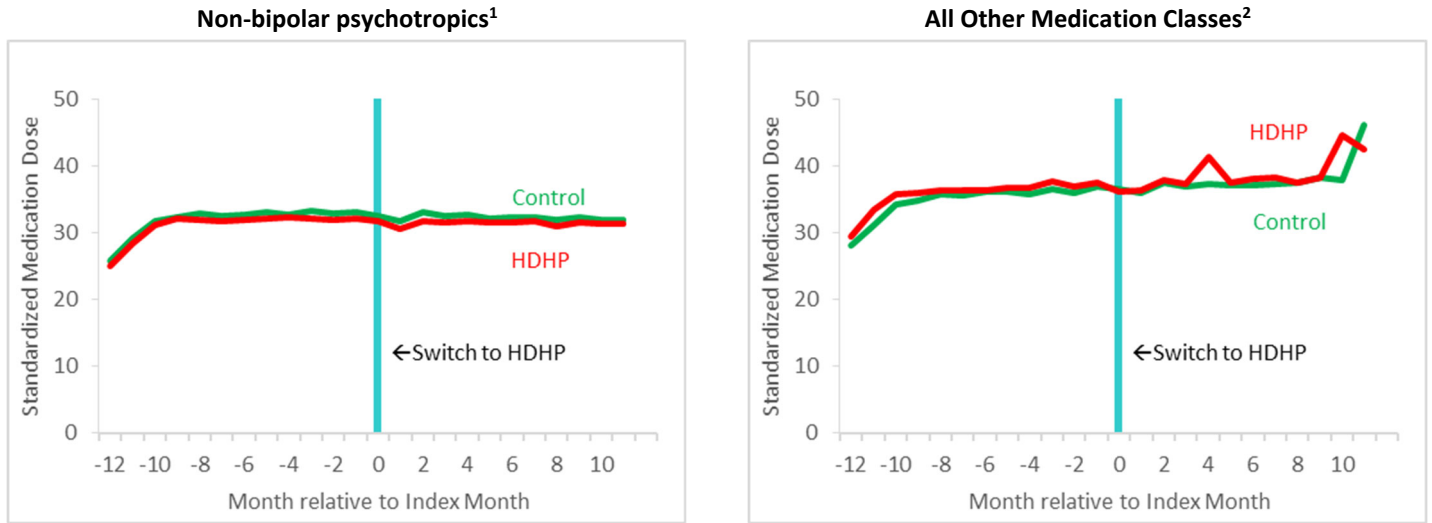

**Abbreviation:** HDHP, high-deductible health plan

<sup>1</sup>Non-bipolar psychotropic medications include the following medication classes: attention deficit hyperactivity disorder medications, antidepressants, benzodiazepines, substance abuse disorder medications, anxiolytics, sedatives and hypnotics; <sup>2</sup>All other medications include all prescribed medications from classes not included in the bipolar and non-bipolar psychotropic categories

## References

1. Krieger N: Overcoming the absence of socioeconomic data in medical records: validation and application of a census-based methodology. *Am J Public Health* 82: 703–710, 1992.
2. Krieger N, Chen JT, Waterman PD, et al.: Race/Ethnicity, Gender, and Monitoring Socioeconomic Gradients in Health: A Comparison of Area-Based Socioeconomic Measures—The Public Health Disparities Geocoding Project. *Am J Public Health* 93: 1655–1671, 2003.
3. US Census Bureau: American Community Survey (ACS). The United States Census Bureau. Washington, D.C. <https://www.census.gov/programs-surveys/acs>
4. Ethnic Technologies. Ethnic Technologies. S. Hackensack, NJ. <http://www.ethnictechnologies.com/>
5. Fiscella K, Fremont AM: Use of Geocoding and Surname Analysis to Estimate Race and Ethnicity. *Health Serv Res* 41: 1482–1500, 2006.
6. The Johns Hopkins ACG® System, Installation and Usage Guide, Version 10.0. Baltimore, MD, John Hopkins University, 2013. <https://www.hopkinsacg.org/document/acg-system-version-10-0-installation-and-usage-guide/>
7. Reid RJ, Roos NP, MacWilliam L, et al.: Assessing Population Health Care Need Using a Claims-based ACG Morbidity Measure: A Validation Analysis in the Province of Manitoba. *Health Serv Res* 37: 1345–1364, 2002.



**Figure 1.** Monthly out-of-pocket spending for all bipolar medications and by bipolar medication class among members with bipolar disorder before and after a mandated switch to HDHPs, compared with matched controls who were in low-deductible plans in both years.

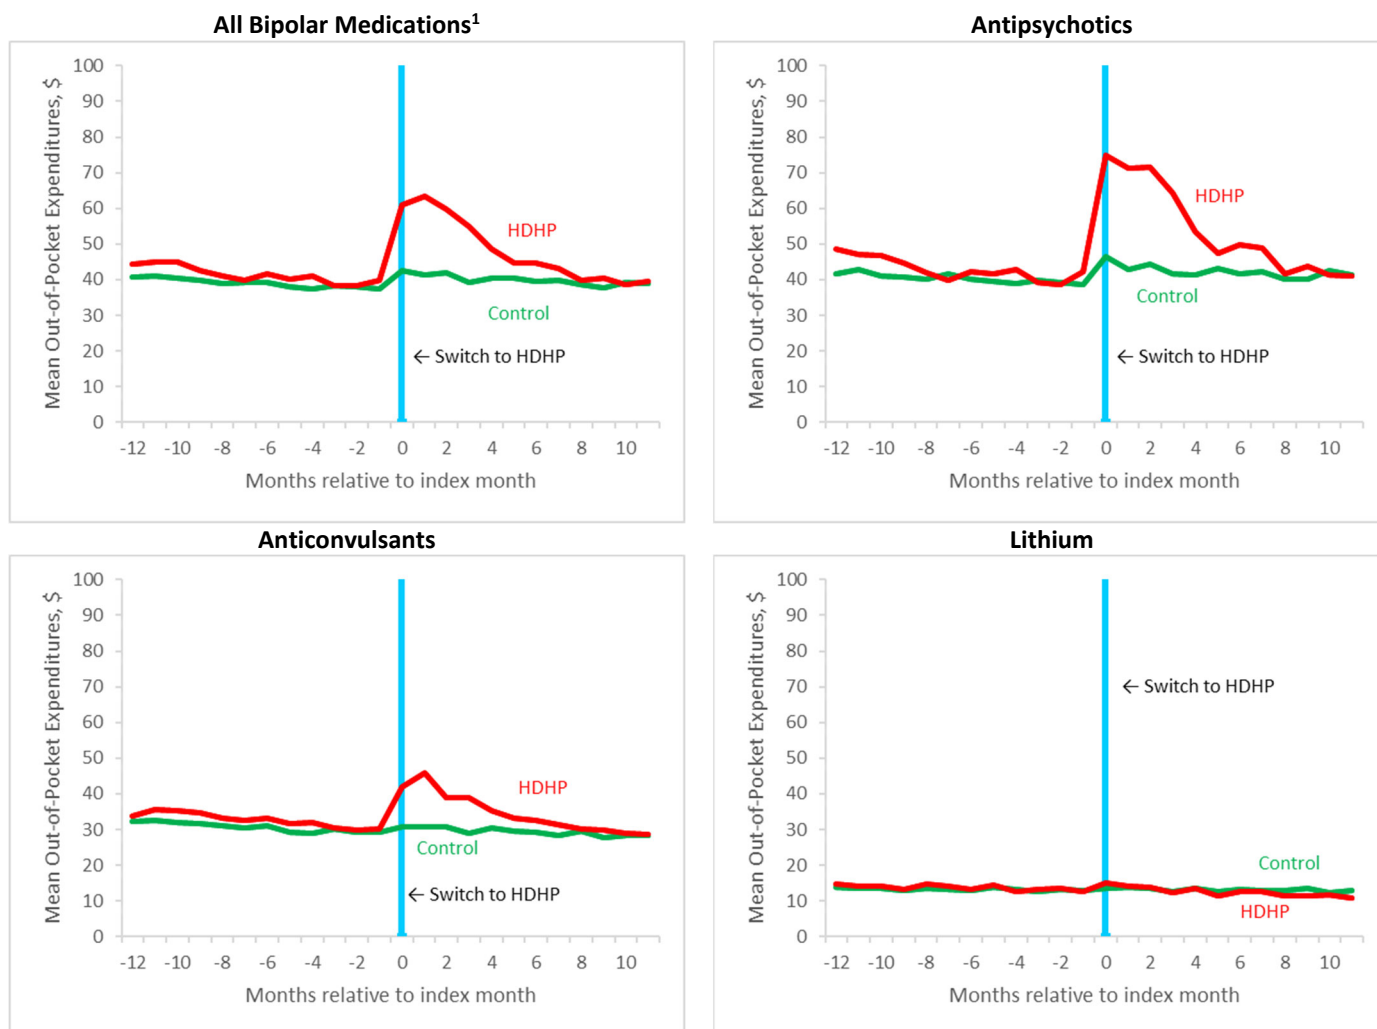

**Abbreviations:** HDHP, high-deductible health plan. Vertical blue lines are centered at the index month when HDHP group members were switched into HDHPs. <sup>1</sup>Bipolar drugs include the following medication classes: anticonvulsants, antipsychotics and lithium

**Figure 2.** Average monthly number of standardized medication dose for bipolar medications (1<sup>st</sup> and 2<sup>nd</sup> generation antipsychotics, guideline-recommended anticonvulsants, or lithium) among members with bipolar disorder before and after a mandated switch to HDHPs, compared with matched controls in low-deductible plans in both years.

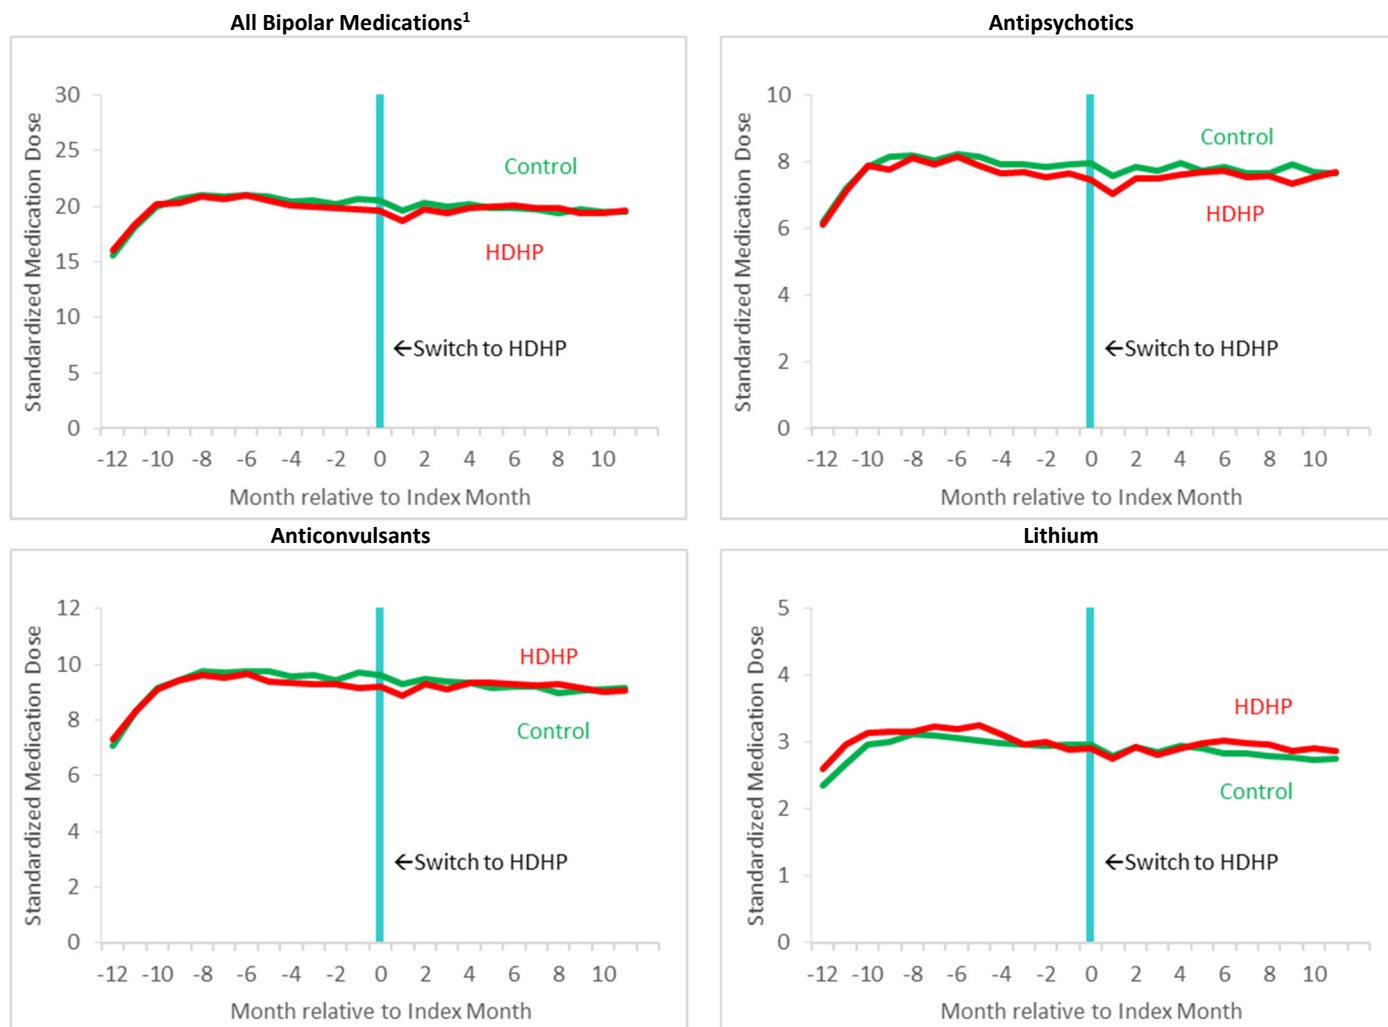

**Abbreviations:** HDHP, high-deductible health plan. Vertical blue lines are centered at the index month when HDHP group members were switched into HDHPs. <sup>1</sup>Bipolar drugs include the following medication classes: anticonvulsants, antipsychotics and lithium
